# Supplementary material for: Near-zero thermal expansion coordinated with geometric flexibility and π⋯π interaction in anisotropic [Zn8(SiO4)(m-BDC)6]n
Source: Royal Society of Chemistry journal article supplement (doi:10.1039/c9qi00354a), 2019-01-01
Supplement: c9qi00354a1.pdf [file c9qi00354a1.pdf]

# Supporting Information

## **Near-Zero Thermal Expansion Coordinated with Geometric Flexibility and $\pi\cdots\pi$ Interaction in Anisotropic $[\text{Zn}_8(\text{SiO}_4)(m\text{-BDC})_6]_n$**

Zhanning Liu,<sup>a</sup> Xingxing Jiang,<sup>b</sup> Chiming Wang,<sup>c</sup> Chenxi Liu,<sup>c</sup> Zheshuai Lin,<sup>b</sup> Jinxia Deng,<sup>a</sup> Jun Chen,<sup>a</sup> and Xianran Xing<sup>\*a</sup>

a. Beijing Advanced Innovation Center for Materials Genome Engineering, Department of Physical Chemistry, University of Science and Technology Beijing, Beijing, 100083, China

b. Key Lab of Functional Crystals and Laser Technology, Technical Institute of Physics and Chemistry, Chinese Academy of Sciences, Beijing 100190, China

c. Beijing Key Laboratory for Science and Application of Function Molecular and Crystalline Materials, University of Science and Technology Beijing, Beijing, 100083, China

## 1. Synthesis

$[\text{Zn}_8(\text{SiO}_4)(m\text{-BDC})_6]_n$  was synthesized by hydrothermal reaction. 1,3-benzenedicarboxylic acid ( $m\text{-H}_2\text{BDC}$ , 332 mg, 2 mmol) was dissolved in 2 mL NaOH (1M) solution, then 2 mL aqueous solution containing  $\text{Na}_2\text{SiO}_3 \cdot 9\text{H}_2\text{O}$  (56.8 mg 2 mmol) was added. The pH of the solution was adjusted to 7 using 1M  $\text{HNO}_3$  solution, and finally 1 mL aqueous solution containing  $\text{Zn}(\text{NO}_3)_2 \cdot 6\text{H}_2\text{O}$  (594 mg 2 mmol) was added. After stirring under air for 10 minutes, the mixture was transfer to a 25 mL Teflon-lined reactor and the reactor was heated at 200°C for 100 hours, then gradually cooled to room temperature with a rate of 5°C/h. The colourless crystals were obtained and washed several times with deionized water.

## 2. Thermogravimetric analysis

Thermo-Gravimetric-Differential Scanning Calorimetry (TG-DSC) measurement was performed using a Labsys Evo system (by SETRAM) with a rate of 5°C·min<sup>-1</sup> under air.

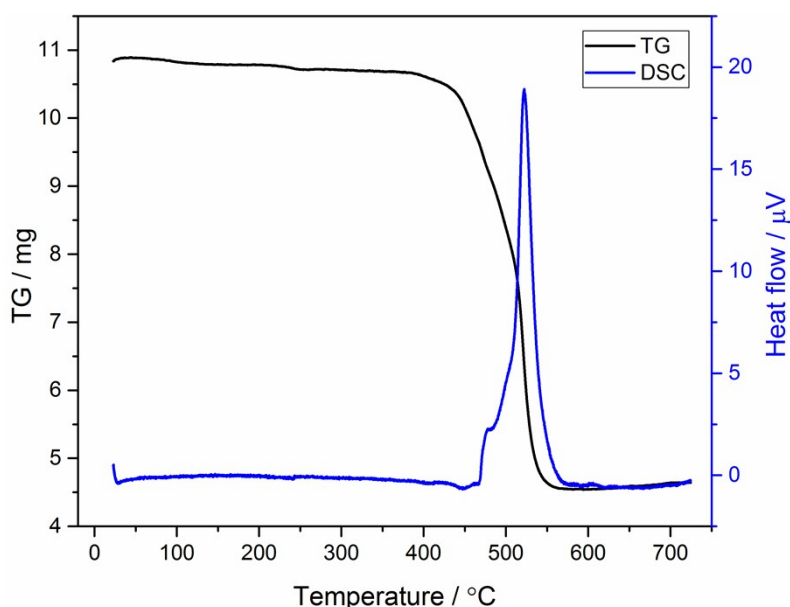

**Figure S1** TG-DSC curves of  $[\text{Zn}_8(\text{SiO}_4)(m\text{-BDC})_6]_n$  measured under air.

## 3. Variable temperature high resolution synchrotron X-ray powder diffraction

Variable temperature high resolution synchrotron powder X-ray diffraction data was collected from 100 to 475 K with an interval of 25 K using the 11-BM-B beamline located at Advanced Photon Source, Argonne National Laboratory. The sample was loaded into a 0.8mm diameter Kapton capillary. The capillary was spun at several radians per second to improve particle statistics.

Temperature was controlled from 100 to 475 K with a heating rate of 120 K/h using an Oxford Cryostream 700+ N<sub>2</sub> gas blower. Rietveld refinement to the diffraction data was used within GSAS<sup>[1]</sup> using the EXPGUI<sup>[2]</sup> interface (Figure S3). The exact wavelength (0.4127 Å) were determined from the reflections of a CeO<sub>2</sub> standard. The background was modelled by a shifted Chebyshev polynomial with 18 parameters. The scale factor, lattice parameters, zero point were also refined. The Pseudo-voigt function was chosen to generate the peak shapes. The coordinates and isotropic atomic displacement parameter were refined for all atoms except hydrogen atoms. The result of the final Rietveld refinement plot and results are shown in figure S3 and table S1. The lattice parameters extracted from Rietveld refinements are listed in Table S1.

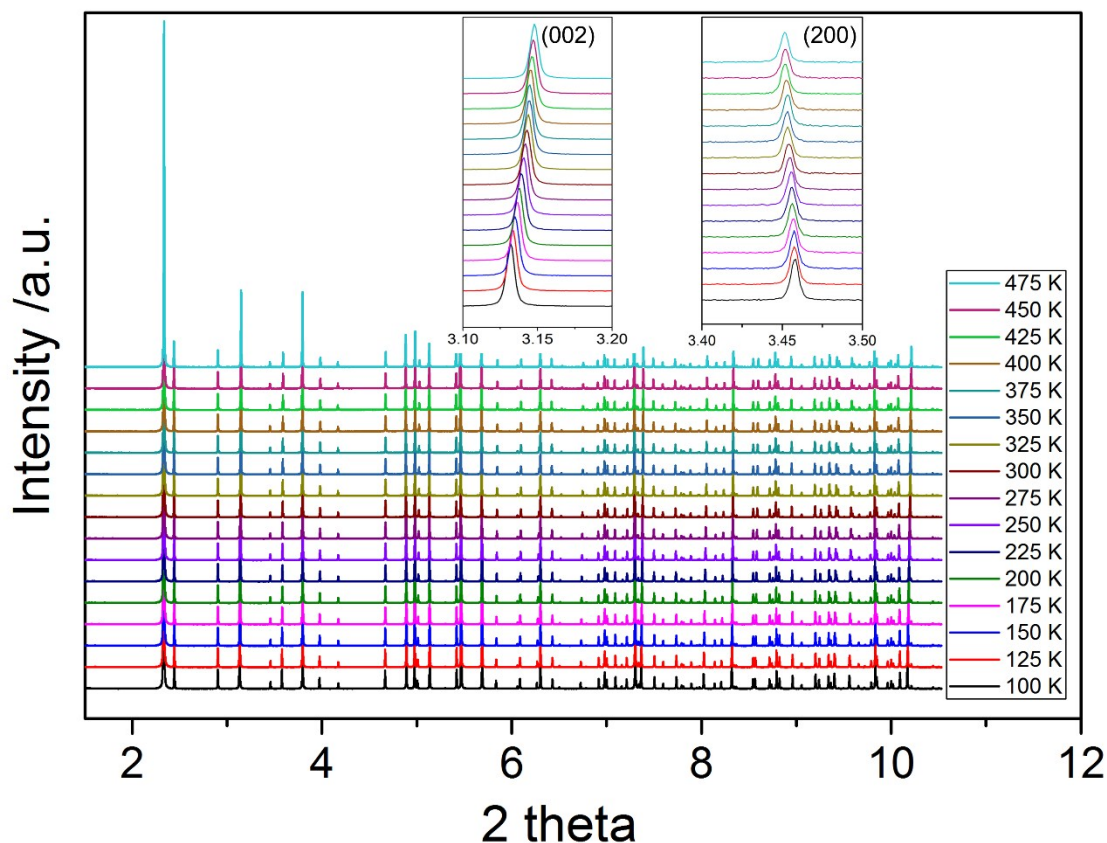

**Figure S2** Temperature dependent synchrotron PXRD patterns of  $[\text{Zn}_8(\text{SiO}_4)(m\text{-BDC})_6]_n$ . The two insets show the shift of reflections (002) and (200).

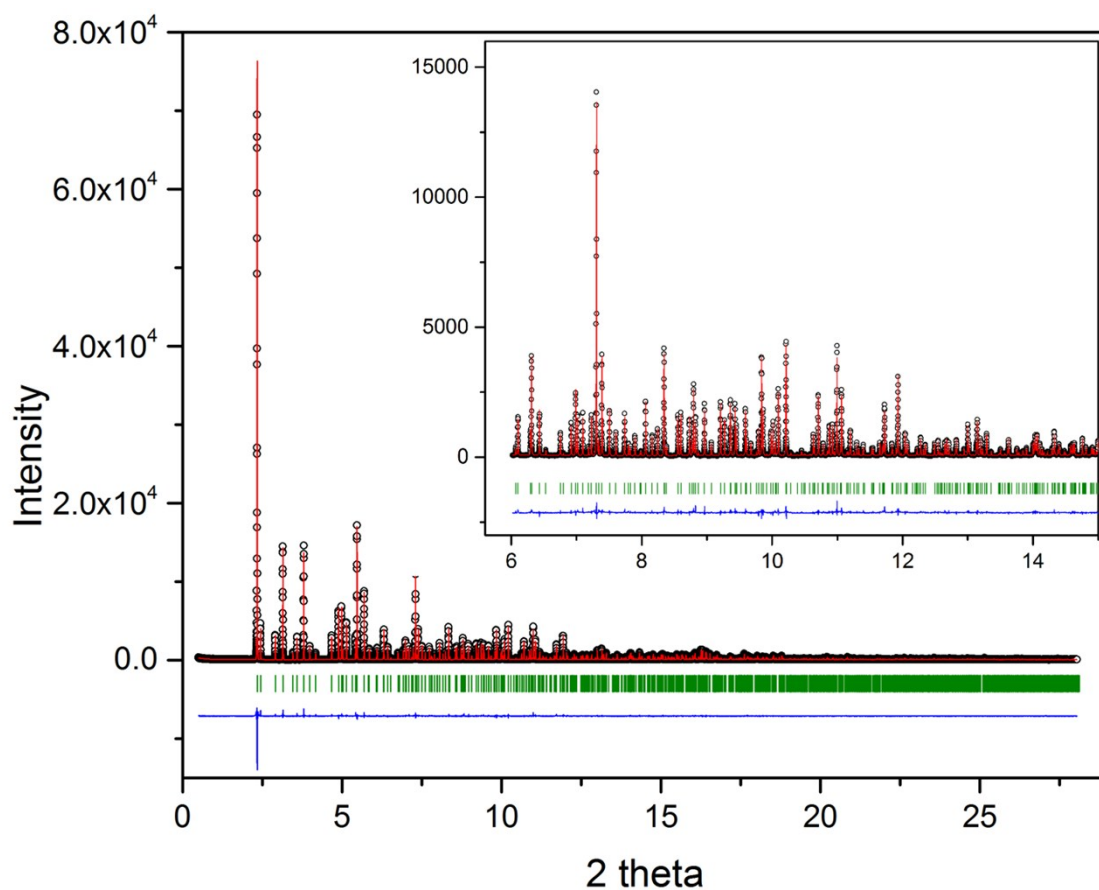

**Figure S3** Final Rietveld refinement plot of  $[\text{Zn}_8(\text{SiO}_4)(m\text{-BDC})_6]_n$  at 300 K. A zoomed-in plot is shown in the inset. ( $R_p=6.99\%$ ,  $wR_p=9.45\%$ ,  $\chi^2=2.322$ ).

**Table S1** Unit cell parameters obtained from Rietveld refinement to the synchrotron PXRD data

| T / K | a / Å       | c / Å       | V / Å <sup>3</sup> |
|-------|-------------|-------------|--------------------|
| 100   | 13.66225(2) | 15.08438(2) | 2815.604(9)        |
| 125   | 13.66379(2) | 15.07704(2) | 2814.871(9)        |
| 150   | 13.66545(2) | 15.07038(2) | 2814.311(9)        |
| 175   | 13.66732(2) | 15.06418(2) | 2813.925(10)       |
| 200   | 13.66929(2) | 15.05816(2) | 2813.610(10)       |
| 225   | 13.67133(2) | 15.05173(2) | 2813.248(10)       |
| 250   | 13.67322(2) | 15.04492(2) | 2812.753(10)       |
| 275   | 13.67533(2) | 15.03853(2) | 2812.426(11)       |
| 300   | 13.67748(2) | 15.03244(2) | 2812.171(10)       |
| 325   | 13.67963(2) | 15.02713(2) | 2812.060(10)       |
| 350   | 13.68071(2) | 15.02404(2) | 2811.928(10)       |
| 375   | 13.68014(2) | 15.02300(2) | 2811.498(10)       |
| 400   | 13.68137(2) | 15.01908(2) | 2811.272(10)       |
| 425   | 13.68423(2) | 15.01399(2) | 2811.490(10)       |
| 450   | 13.68473(2) | 15.01057(2) | 2811.057(10)       |
| 475   | 13.68646(2) | 15.00649(2) | 2811.005(10)       |

## 4. Thermo-dilatometer measurement

Nearly 400 mg  $[\text{Zn}_8(\text{SiO}_4)(m\text{-BDC})_6]_n$  was ground to powder using an agate mortar, and three drops of PVA agglomerant were added. Subsequently, the powder was pressed into a disk with a diameter of 10 mm and thickness of  $\sim 3$  mm at 12 kN for 2 min. The formed disk was transferred to an oven at 280 °C for 2 h. The linear thermal expansion ( $\Delta L/L$ ) of this disk was measured by the thermo-dilatometer (DIL 402 Expedis Select) with a rate of 5 K/min. The little difference of  $\Delta L/L$  between the results of thermo-dilatometer measurements and results extracted from the SXRD may be caused by the existence of PVA agglomerant.

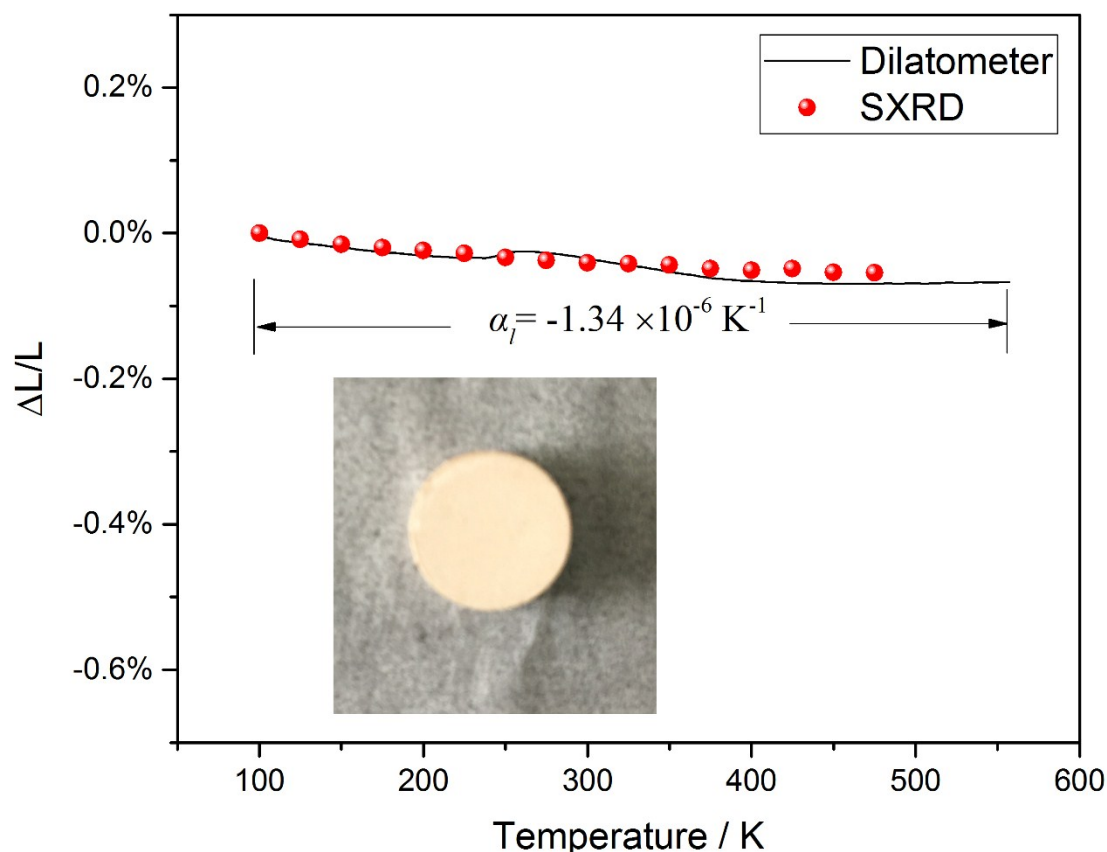

**Figure S4.** Linear thermal expansion behavior of  $[\text{Zn}_8(\text{SiO}_4)(m\text{-BDC})_6]_n$  determined by a thermo-dilatometer (solid line) and isotopically averaged result from the Rietveld refinement. (Inset) Photograph of the pressed disk.

## 5. Variable temperature single crystal X-ray diffraction

Single crystal X-ray diffraction data were collected at the beamline BL26B1(Spring-8) using a wavelength of 0.7212 Å at 100 K, 150 K, 200 K, 250 K, and 300 K. The data were processed with HKL2000 programs. The structure was solved by the direct method (SHELX-2014)<sup>[3]</sup> through the OLEX2<sup>[4]</sup> and refined by full matrix least-squares on  $F^2$ . Anisotropic displacement parameters were used for the non-hydrogen atoms and isotropic parameters for the hydrogen atoms. Hydrogen atoms were added geometrically and refined using riding model. CCDC 1827798-1827802 contain the supplementary crystallographic data for this paper.

**Table S2** Crystal data of  $[\text{Zn}_8(\text{SiO}_4)(m\text{-BDC})_6]_n$  from variable temperature single crystal diffraction.

|                                                         | 100 K                                                  | 150 K                                                  | 200 K                                                  | 250 K                                                  | 300 K                                                  |
|---------------------------------------------------------|--------------------------------------------------------|--------------------------------------------------------|--------------------------------------------------------|--------------------------------------------------------|--------------------------------------------------------|
| Formula                                                 | $\text{C}_{48}\text{H}_{24}\text{O}_{28}\text{SiZn}_8$ | $\text{C}_{48}\text{H}_{24}\text{O}_{28}\text{SiZn}_8$ | $\text{C}_{48}\text{H}_{24}\text{O}_{28}\text{SiZn}_8$ | $\text{C}_{48}\text{H}_{24}\text{O}_{28}\text{SiZn}_8$ | $\text{C}_{48}\text{H}_{24}\text{O}_{28}\text{SiZn}_8$ |
| Formula weight                                          | 1599.72                                                | 1599.72                                                | 1599.72                                                | 1599.72                                                | 1599.72                                                |
| Temperature / K                                         | 100                                                    | 150                                                    | 200                                                    | 250                                                    | 300                                                    |
| Crystal system                                          | tetragonal                                             | tetragonal                                             | tetragonal                                             | tetragonal                                             | tetragonal                                             |
| Space group                                             | $P4_2/n$                                               | $P4_2/n$                                               | $P4_2/n$                                               | $P4_2/n$                                               | $P4_2/n$                                               |
| a / Å                                                   | 13.6840(2)                                             | 13.6875(2)                                             | 13.6914(2)                                             | 13.6944(2)                                             | 13.6997(2)                                             |
| b / Å                                                   | 13.6840 (2)                                            | 13.6875(2)                                             | 13.6914(2)                                             | 13.6944(2)                                             | 13.6997(2)                                             |
| c / Å                                                   | 15.0654(3)                                             | 15.0535(3)                                             | 15.0409(4)                                             | 15.0329(4)                                             | 15.0187(3))                                            |
| $\alpha$ / °                                            | 90                                                     | 90                                                     | 90                                                     | 90                                                     | 90                                                     |
| $\beta$ / °                                             | 90                                                     | 90                                                     | 90                                                     | 90                                                     | 90                                                     |
| $\gamma$ / °                                            | 90                                                     | 90                                                     | 09                                                     | 90                                                     | 90                                                     |
| Volume / Å <sup>3</sup>                                 | 2821.01(10)                                            | 2820.25(11)                                            | 2819.47(12)                                            | 2819.22(11)                                            | 2818.73(9)                                             |
| Z                                                       | 2                                                      | 2                                                      | 2                                                      | 2                                                      | 2                                                      |
| $\rho_{\text{calc}}$ g/cm <sup>3</sup>                  | 1.883                                                  | 1.884                                                  | 1.884                                                  | 1.884                                                  | 1.884                                                  |
| Reflections collected                                   | 4771                                                   | 4937                                                   | 4857                                                   | 4813                                                   | 4698                                                   |
| Independent reflections                                 | 2488                                                   | 2494                                                   | 2491                                                   | 2499                                                   | 2491                                                   |
| Data/restraints/parameters                              | 2488/0/193                                             | 2494/0/193                                             | 2491/0/193                                             | 2499/0/193                                             | 2491/0/193                                             |
| GOF on F <sup>2</sup>                                   | 1.173                                                  | 1.177                                                  | 1.182                                                  | 1.133                                                  | 1.172                                                  |
| R <sub>1</sub> ,wR <sub>2</sub> [ $I \geq 2\sigma(I)$ ] | R <sub>1</sub> = 0.0281,<br>wR <sub>2</sub> = 0.0665   | R <sub>1</sub> = 0.0278,<br>wR <sub>2</sub> = 0.0699   | R <sub>1</sub> = 0.0279,<br>wR <sub>2</sub> = 0.0695   | R <sub>1</sub> = 0.0272,<br>wR <sub>2</sub> = 0.0670   | R <sub>1</sub> = 0.0322,<br>wR <sub>2</sub> = 0.0827   |
| R <sub>1</sub> ,wR <sub>2</sub> [all data]              | R <sub>1</sub> = 0.0305,<br>wR <sub>2</sub> = 0.0676   | R <sub>1</sub> = 0.0303,<br>wR <sub>2</sub> = 0.0711   | R <sub>1</sub> = 0.0305,<br>wR <sub>2</sub> = 0.0709   | R <sub>1</sub> = 0.0303,<br>wR <sub>2</sub> = 0.0685   | R <sub>1</sub> = 0.0343,<br>wR <sub>2</sub> = 0.0840   |
| CCDC number                                             | 1827798                                                | 1827801                                                | 1827799                                                | 1827800                                                | 1827802                                                |

## 6. Variable temperature Raman spectra study

The variable temperature Raman measurements were performed with a multichannel modular triple Raman system (JY-HR800) with confocal microscopy. The spot diameter of the focused laser beam on the sample is about 1  $\mu\text{m}$ . The solid-state diode laser (532nm) from Coherent Company-Verdi-2 was used as an excited source. Sample temperature was controlled by a temperature-controlled stage (Linkam) between 100 and 600K.

The first-principles atomic vibration modes assignment was performed by the plane-wave pseudopotential density functional theory (DFT)<sup>[5-6]</sup> implemented by CASTEP package<sup>[7]</sup>. The generalized gradient approximation (GGA) with Perdew–Burke–Ernzerhof (PBE)<sup>[8]</sup> functional was adopted and the ion-electron interactions were modeled by the optimized normal-conserving pseudopotentials<sup>[9]</sup> for all elements. The kinetic energy cutoffs of 800 eV and Monkhorst-Pack<sup>[10]</sup> k-point meshes with the spanning grid less than 0.04/Å<sup>3</sup> in the Brillouin zone were chosen. Before the atomic vibration calculation, the crystal structure was fully optimized by Broyden–Fletcher–Goldfarb–Shanno (BFGS)<sup>[11]</sup> minimization scheme with the convergence criterions for energy, maximum force, maximum stress and maximum displacement set as 10<sup>-5</sup> eV/atom, 0.03 eV, 0.05 GPa and 0.001 Å respectively. The vibrational property was calculated by linear response formalism<sup>[12]</sup>, in which the phonon frequencies were obtained by the second derivative of the total

energy with respect to the given perturbation<sup>[13]</sup>

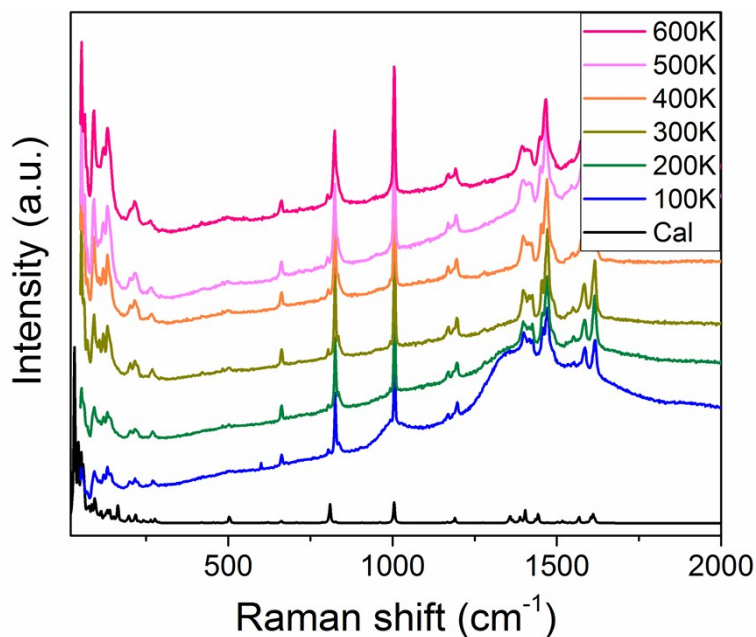

**Figure S5** Temperature dependent Raman spectrum and the calculated result from DFT calculations (black).

## 7. Elastic properties calculated by DFT

The elastic constants were calculated by the finite-strain technology based on the geometrically optimized structure<sup>[13]</sup>, in which the computational parameters were set as the same of the atomic vibration spectrum calculation. In elastic constants calculation, the maximum strain amplitude and the number of steps for each strain were set as 0.003 and 3 steps, respectively.

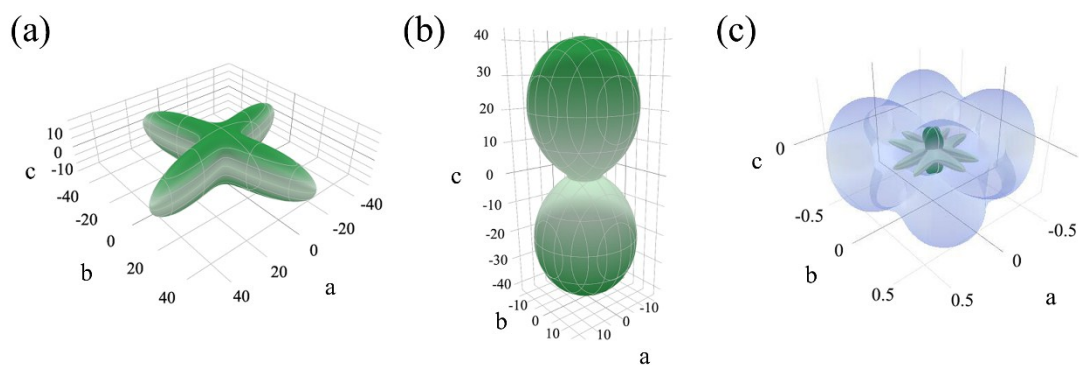

**Figure S6** 3D representations of anisotropic Young's modulus (in GPa, a), linear compressibility (b) and Poisson's ratios (c) for  $[\text{Zn}_8(\text{SiO}_4)(m\text{-BDC})_6]_n$ . The Young's modulus in a given direction is shown as a green surface. Visualization generated using ELATE.<sup>[14]</sup>

## 8. Temperature dependent structural analysis

A topology simplification approach for this complex framework was performed via the TOPOS

program.<sup>[15]</sup> The cluster  $\text{Zn}_8(\text{SiO}_4)$  cores and the *m*-BDC ligands were treated as the nodes of the underlying net. The distances of intermolecular  $\pi\cdots\pi$  interactions are analysed via Platon program based on the Rietveld refinement results.<sup>[16]</sup>

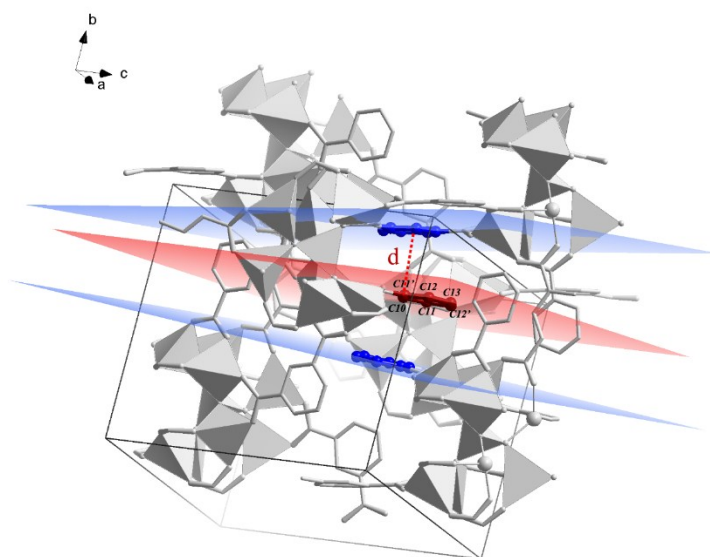

**Figure S7** The schematic diagram of three  $\pi\cdots\pi$  stacked phenyl rings. The three planes are not exactly parallel. The two blue planes are crystallographic equivalent.

**Table S3** The distance of the central phenyl ring atoms to the upper plane in Figure S7.

| Atom name | Distance to the upper plane (Å) at 100K | Distance to the upper plane (Å) at 475K |
|-----------|-----------------------------------------|-----------------------------------------|
| C10       | 3.4158                                  | 3.4674                                  |
| C11       | 3.5598                                  | 3.7719                                  |
| C11'      | 3.4133                                  | 3.4044                                  |
| C12       | 3.5259                                  | 3.5678                                  |
| C12'      | 3.7298                                  | 3.8335                                  |
| C13       | 3.6905                                  | 3.7719                                  |

If we supposed that, the Si...Si unit is rigid (without  $\pi\cdots\pi$  interaction), which means it won't change upon heating. With the same magnitude of geometric deformation (the same changes of  $\beta$  and the value of  $d_{\text{Si}\cdots\text{Si}}$  was fixed as 12.256), the lattice parameters can be calculated from the two equations below (Figure S8). The lattice parameters calculated from the geometric mathematical mode are listed in Table S4. It can be clearly seen that the geometric deformation will give rise to a positive volumetric thermal expansion.



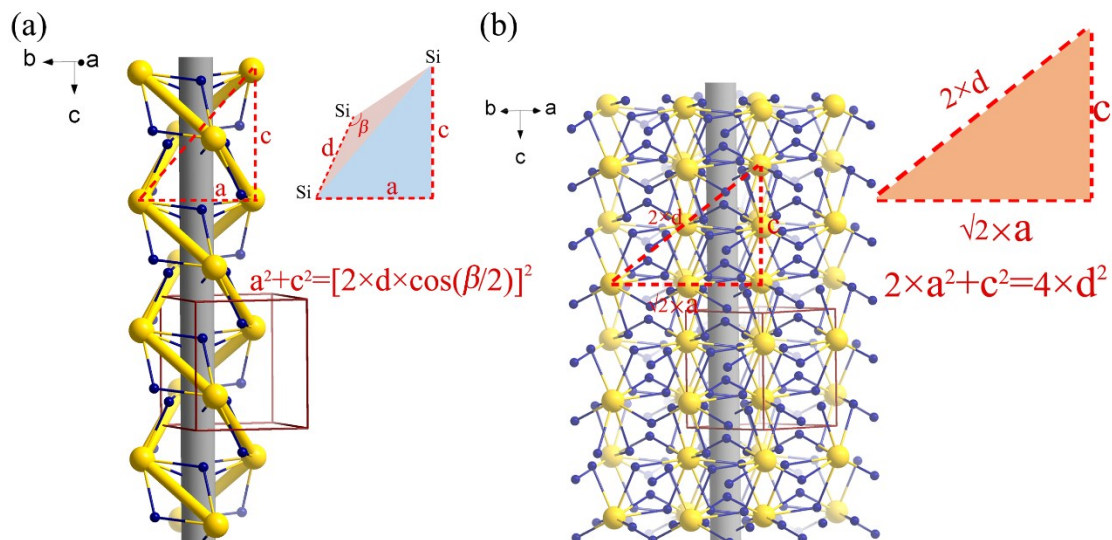

**Figure S8** Geometric mathematical relations between the lattice parameter  $a$ ,  $c$ , the building linkage length  $d$  and the angle  $\beta$  between connected  $\text{Zn}_8(\text{SiO}_4)$  cores.

$$a^2 + c^2 = [2 \times d \times \cos(\frac{\beta}{2})]^2$$

$$2 \times a^2 + c^2 = 4 \times d^2$$

**Table S4** Supposed that the Si...Si linkage is a rigid unit ( $d_{\text{Si} \dots \text{Si}}$  won't change upon heating). The lattice parameter calculated from geometry mathematical model.

| Temperature / K | $\beta$  | $d_{\text{Si} \dots \text{Si}} / \text{\AA}$ | $a / \text{\AA}$ | $c / \text{\AA}$ | $V / \text{\AA}^3$ |
|-----------------|----------|----------------------------------------------|------------------|------------------|--------------------|
| 100             | 112.2527 | 12.256                                       | 13.6620          | 15.0843          | 2815.5010          |
| 125             | 112.2353 | 12.256                                       | 13.6652          | 15.0787          | 2815.7302          |
| 150             | 112.2189 | 12.256                                       | 13.6681          | 15.0733          | 2815.9473          |
| 175             | 112.2029 | 12.256                                       | 13.6708          | 15.0684          | 2816.1446          |
| 200             | 112.1871 | 12.256                                       | 13.6737          | 15.0631          | 2816.3567          |
| 225             | 112.1703 | 12.256                                       | 13.6766          | 15.0578          | 2816.5675          |
| 250             | 112.1532 | 12.256                                       | 13.6799          | 15.0518          | 2816.8033          |
| 275             | 112.1363 | 12.256                                       | 13.6828          | 15.0467          | 2817.0064          |
| 300             | 112.1200 | 12.256                                       | 13.6856          | 15.0414          | 2817.2109          |
| 325             | 112.1052 | 12.256                                       | 13.6883          | 15.0366          | 2817.3989          |
| 350             | 112.0969 | 12.256                                       | 13.6898          | 15.0339          | 2817.5014          |
| 375             | 112.0961 | 12.256                                       | 13.6899          | 15.0337          | 2817.5117          |
| 400             | 112.0859 | 12.256                                       | 13.6917          | 15.0304          | 2817.6394          |
| 425             | 112.0700 | 12.256                                       | 13.6945          | 15.0253          | 2817.8352          |
| 450             | 112.0620 | 12.256                                       | 13.6959          | 15.0227          | 2817.9339          |
| 475             | 112.0508 | 12.256                                       | 13.6981          | 15.0187          | 2818.0852          |

**Table S5** Supposed that the angle  $\beta$  is a rigid unit (without geometric deformation). The lattice

parameters calculated from geometry mathematical model.

| Temperature /<br>K | $\beta$  | $d_{\text{Si} \dots \text{Si}} / \text{\AA}$ | $a / \text{\AA}$ | $c / \text{\AA}$ | $V / \text{\AA}^3$ |
|--------------------|----------|----------------------------------------------|------------------|------------------|--------------------|
| 100                | 112.2527 | 12.256                                       | 13.66196         | 15.08418         | 2815.45095         |
| 125                | 112.2527 | 12.255                                       | 13.66085         | 15.08295         | 2814.76184         |
| 150                | 112.2527 | 12.254                                       | 13.65973         | 15.08172         | 2814.07285         |
| 175                | 112.2527 | 12.253                                       | 13.65862         | 15.08049         | 2813.38397         |
| 200                | 112.2527 | 12.252                                       | 13.6575          | 15.07926         | 2812.6952          |
| 225                | 112.2527 | 12.251                                       | 13.65639         | 15.07803         | 2812.00655         |
| 250                | 112.2527 | 12.25                                        | 13.65527         | 15.0768          | 2811.31801         |
| 275                | 112.2527 | 12.249                                       | 13.65416         | 15.07557         | 2810.62958         |
| 300                | 112.2527 | 12.249                                       | 13.65416         | 15.07557         | 2810.62958         |
| 325                | 112.2527 | 12.248                                       | 13.65304         | 15.07434         | 2809.94126         |
| 350                | 112.2527 | 12.248                                       | 13.65304         | 15.07434         | 2809.94126         |
| 375                | 112.2527 | 12.247                                       | 13.65193         | 15.07311         | 2809.25305         |
| 400                | 112.2527 | 12.247                                       | 13.65193         | 15.07311         | 2809.25305         |
| 425                | 112.2527 | 12.247                                       | 13.65193         | 15.07311         | 2809.25305         |
| 450                | 112.2527 | 12.246                                       | 13.65082         | 15.07187         | 2808.56496         |
| 475                | 112.2527 | 12.246                                       | 13.65082         | 15.07187         | 2808.56496         |

## 9. Reduced density gradient calculations

The reduced density gradient (RDG)<sup>[17]</sup> calculations were carried out to investigate the intramolecular force between benzene moieties on the basis of B3LYP<sup>[18-21]</sup>/6-311G(d)<sup>[22-24]</sup> using Gaussian 09 D.01 package<sup>[25]</sup> and Multiwfn 3.4<sup>[26]</sup>, visualized by Visual Molecular Dynamics (VMD)<sup>[27]</sup>.

## Reference:

- [1] A. C. Larson, R. B. Von Dreele, *Report LAUR* **1994**, 86-748.
- [2] B. H. Toby, *Journal of applied crystallography* **2001**, 34, 210-213.
- [3] G. M. Sheldrick, *Acta Crystallographica Section C: Structural Chemistry* **2015**, 71, 3-8.
- [4] O. V. Dolomanov, L. J. Bourhis, R. J. Gildea, J. A. Howard, H. Puschmann, *Journal of Applied Crystallography* **2009**, 42, 339-341.
- [5] W. Kohn, L. J. Sham, *Physical Review* **1965**, 140, 1133-&.
- [6] M. C. Payne, M. P. Teter, D. C. Allan, T. A. Arias, J. D. Joannopoulos, *Reviews of Modern Physics* **1992**, 64, 1045-1097.
- [7] S. J. Clark, M. D. Segall, C. J. Pickard, P. J. Hasnip, M. J. Probert, K. Refson, M. C. Payne, *Zeitschrift Fur Kristallographie* **2005**, 220, 567-570.
- [8] J. P. Perdew, K. Burke, M. Ernzerhof, *Physical Review Letters* **1996**, 77, 3865-3868.
- [9] D. R. Hamann, M. Schluter, C. Chiang, *Physical Review Letters* **1979**, 43, 1494-1497.
- [10] H. J. Monkhorst, J. D. Pack, *Physical Review B* **1976**, 13, 5188-5192.
- [11] B. G. Pfrommer, M. Cote, S. G. Louie, M. L. Cohen, *Journal of Computational Physics* **1997**, 131, 233-240.

- [12] S. Baroni, S. de Gironcoli, A. Dal Corso, P. Giannozzi, *Reviews of Modern Physics* **2001**, 73, 515-562.
- [13] V. B. Deyirmenjian, V. Heine, M. C. Payne, V. Milman, R. M. LyndenBell, M. W. Finnis, *Physical Review B* **1995**, 52, 15191-15207.
- [14] R. Gaillac, P. Pullumbi, F.-X. Coudert, *Journal of Physics: Condensed Matter* **2016**, 28, 275201.
- [15] V. A. Blatov, *IUCr CompComm Newsletter* **2006**, 7, 4-38.
- [16] A. Spek, *Journal of Applied Crystallography* **2003**, 36, 7-13.
- [17] E. R. Johnson, S. Keinan, P. Mori-Sanchez, J. Contreras-Garcia, A. J. Cohen, W. Yang, *Journal of the American Chemical Society* **2010**, 132, 6498-6506.
- [18] A. Becke, *J. Chem. Phys.* **1993**, 98, 5648.
- [19] C. Lee, *Phys. Rev. B* **1988**, 37, 785.
- [20] S. Grimme, *The Journal of chemical physics* **2006**, 124, 034108.
- [21] S. Grimme, S. Ehrlich, L. Goerigk, *Journal of computational chemistry* **2011**, 32, 1456-1465.
- [22] R. Krishnan, *J. Chem. Phys.* **1980**, 72, 650.
- [23] A. McLean, *J. Chem. Phys.* **1980**, 72, 5639.
- [24] P. J. Hay, W. R. Wadt, *The Journal of Chemical Physics* **1985**, 82, 299-310.
- [25] M. Frisch, G. Trucks, H. Schlegel, G. Scuseria, M. Robb, J. Cheeseman, G. Scalmani, V. Barone, B. Mennucci, G. Petersson, *Gaussian Inc.: Wallingford, CT, USA* **2009**.
- [26] T. Lu, F. Chen, *Journal of computational chemistry* **2012**, 33, 580-592.
- [27] W. Humphrey, A. Dalke, K. Schulten, *Journal of molecular graphics* **1996**, 14, 33-38.
